# Supplementary material for: Protective effect of Potentilla anserina polysaccharide on cadmium-induced nephrotoxicity in vitro and in vivo
Source: Royal Society of Chemistry journal article supplement (doi:10.1039/c7fo00495h), 2017-01-01

## Protective effect of *Potentilla anserina* polysaccharide on cadmium induced nephrotoxicity in vitro and in vivo

Rong Shen<sup>a</sup>, Disheng Liu<sup>b</sup>, Chenchen Hou<sup>a</sup>, Di Liu<sup>a</sup>, Lixia Zhao<sup>a, d</sup>, Ju Cheng<sup>a\*</sup>, Degui Wang<sup>c\*</sup>, Decheng Bai<sup>a\*</sup>

\*Corresponding authors:

Degui Wang, School of Basic Medical Sciences, Lanzhou University, 199 West Donggang Road,  
Lanzhou 730000, Gansu, China

Decheng Bai, School of Basic Medical Sciences, Lanzhou University, 199 West Donggang Road,  
Lanzhou 730000, Gansu, China

Email: [bdc@lzu.edu.cn](mailto:bdc@lzu.edu.cn).

### Supplementary:

#### 1. Fig. S1 The standard curve of glucose

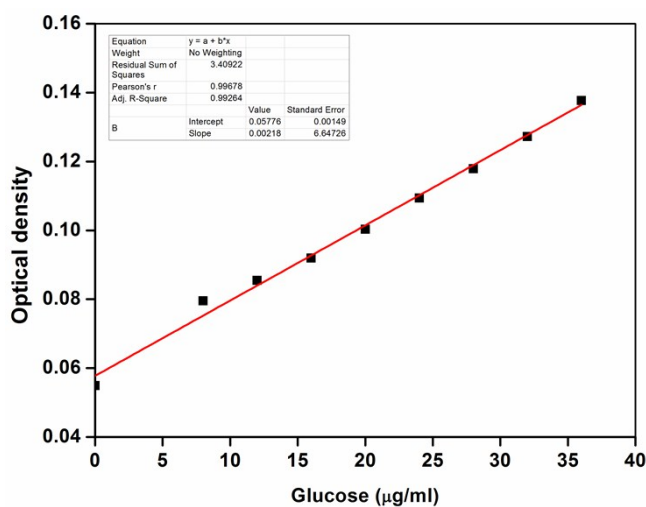

2. Fig. S2 Infrared spectra analysis of *Potentilla anserina* polysaccharide

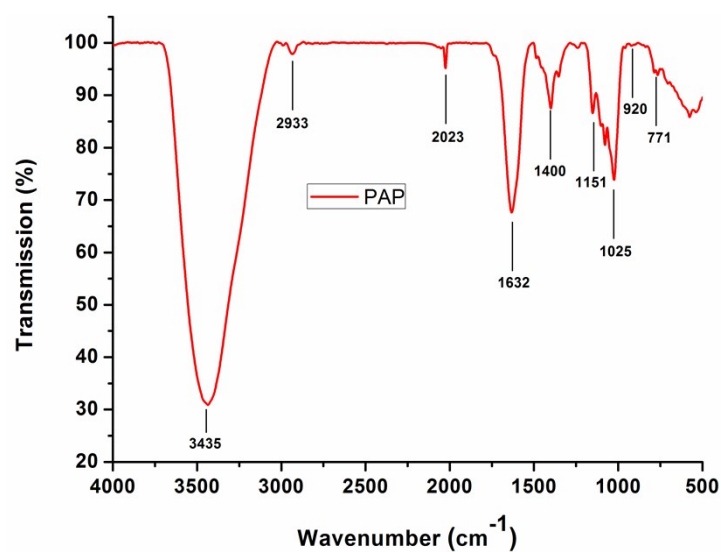

In the infrared spectrum analysis result, the 3435 cm<sup>-1</sup> absorption peak is the characteristic peak of hydroxyl (-OH); the 2933 cm<sup>-1</sup> absorption peak is the characteristic peak of carbon-hydrogen bond (C-H); the 1632 cm<sup>-1</sup> absorption peak is the characteristic peak of carbonyl (C=O); the absorption peak from 1151 cm<sup>-1</sup> to 1025 cm<sup>-1</sup> is the characteristic peak of C-O-C and C-O-H in pyranoside; the 920 cm<sup>-1</sup> and 771 cm<sup>-1</sup> absorption peak are the asymmetric and symmetric stretching vibration absorption center of pyran ring in saccharide respectively.

3. Fig. S3 HPLC chromatogram of PAP

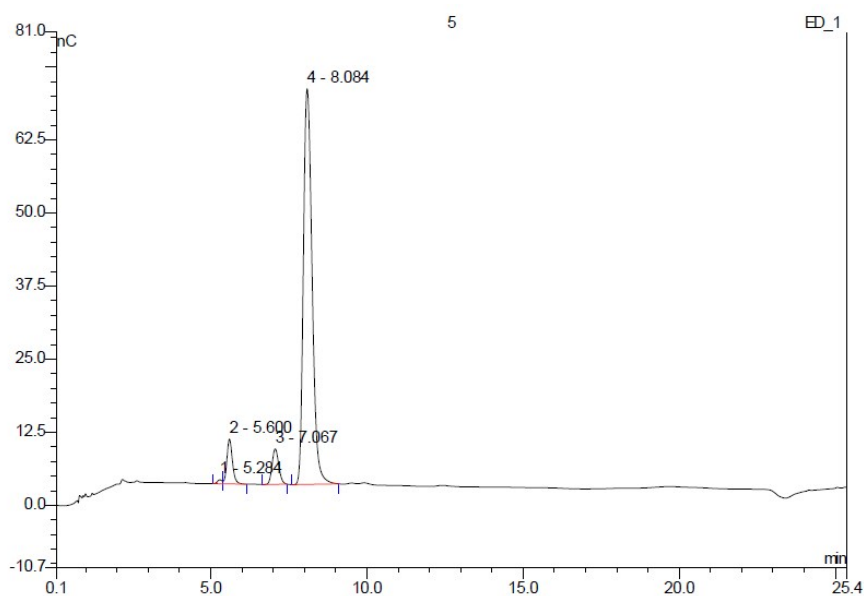

1-rhamnose (2.52%), 2-galactose (6.62%), 3-arabinose (6.85%), 4-glucose (44.5%) .

4. **Fig. S4** Organ indexes, BUN and SCr

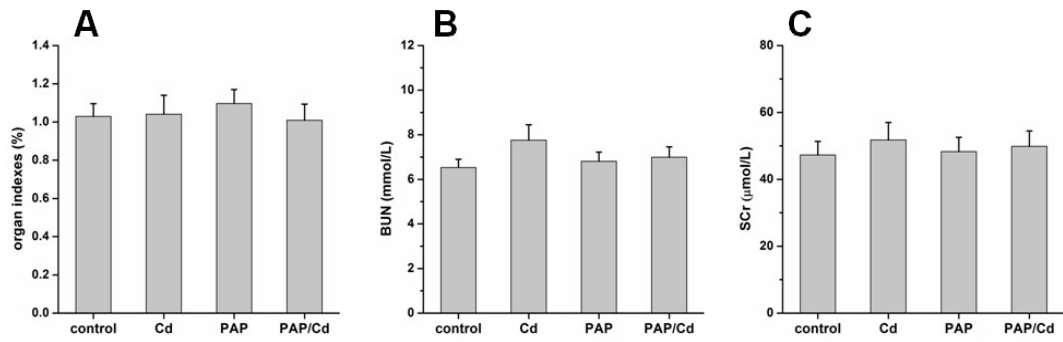

5. **Fig. S5** Masson's trichrome staining

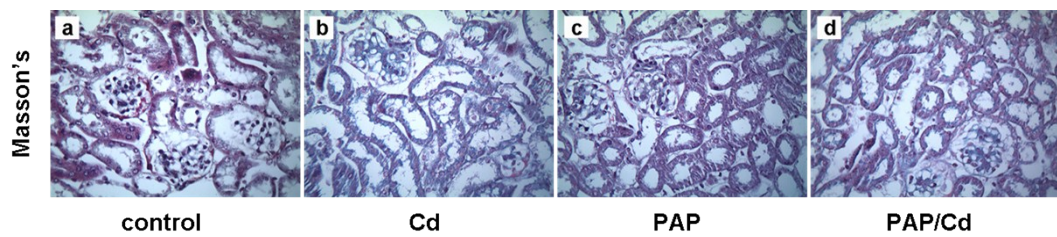

Supplement: c7fo00495h1.pdf [file c7fo00495h1.pdf]
